# Supplementary material
Source: PubMed Central journal article supplement (PMC6480306)

# Supplementary Fig.1

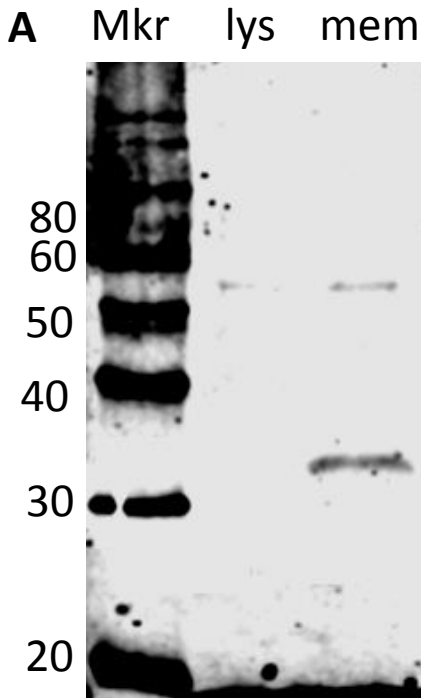

Characteristics of Pgrmc1 and mPR $\alpha$  antibodies used in proximity ligation assay (A,B, C). Western blot analyses of zebrafish ovarian membrane (mem) and lysate (lys) with an antibody (1:1000) generated in mice against a peptide sequence in zebrafish Pgrmc1 (A) and an antibody (1:2000) generated in rabbits against a peptide sequences in zebrafish mPR $\alpha$  (B,C). Results of preincubation with the peptide antigen are shown in (C).

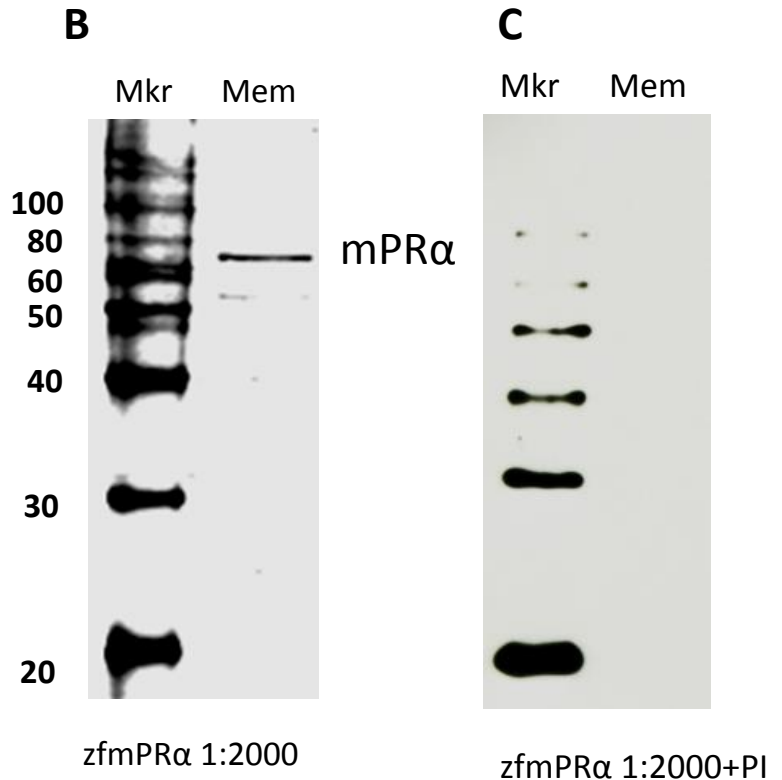

Supplement: NIHMS1015179-supplement-supplemental_1.pdf [file NIHMS1015179-supplement-supplemental_1.pdf]
