# Supplementary material
Source: PubMed Central journal article supplement (PMC6480306)
Supplement: NIHMS1015179-supplement-supplemental_2.pdf [file NIHMS1015179-supplement-supplemental_2.pdf]

Supplementary Fig. 2

**A**

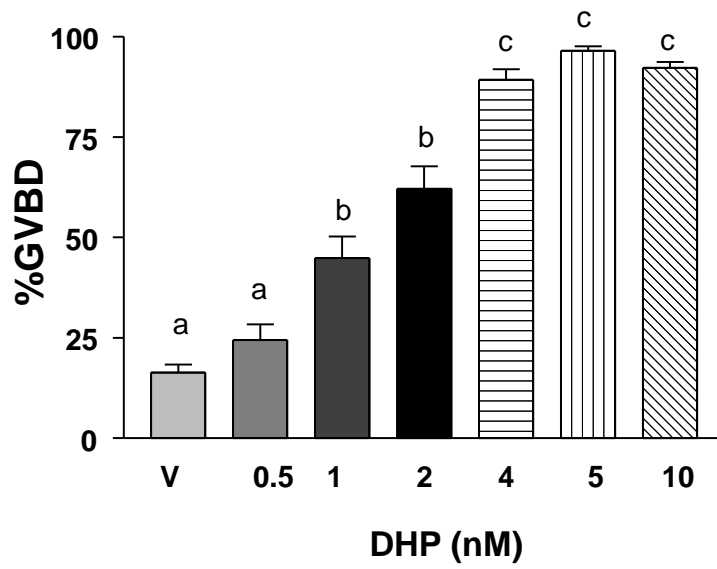

**B**

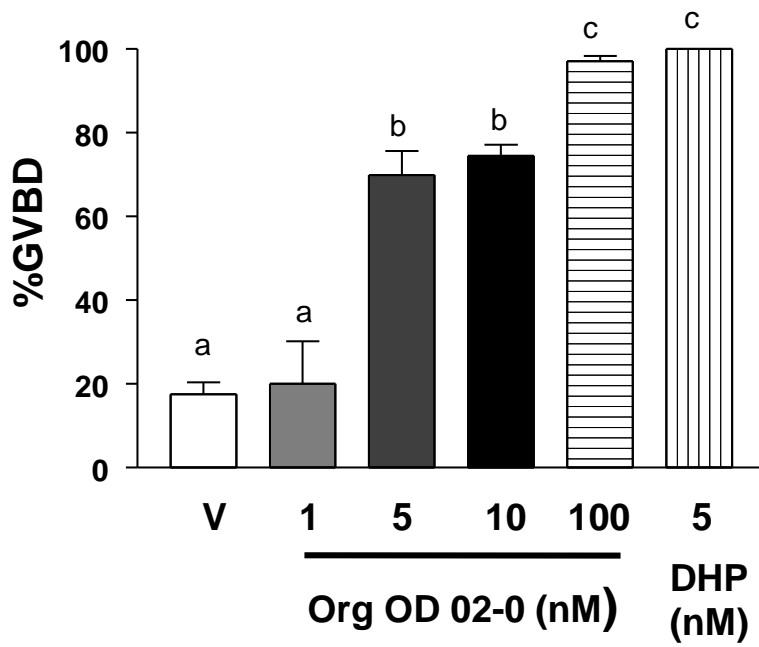

## Supplementary Fig. 2

**C**

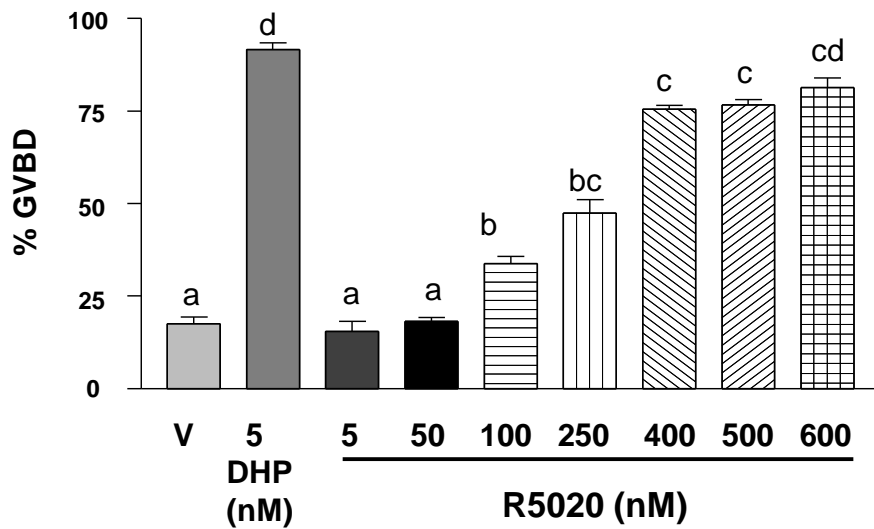

**D**

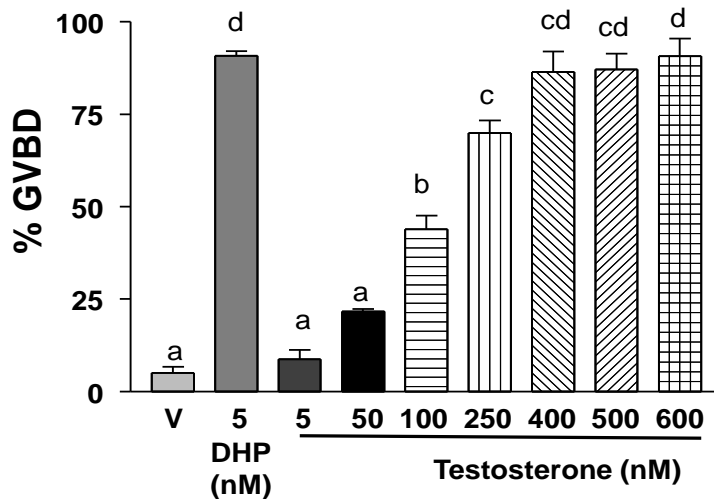

Supplementary figure 2. Dose-response relationships of DHP (A), Org OD 02-0 (B), R5020 (C), and testosterone (D) on induction of oocyte maturation in the zebrafish GVBD bioassay. Each treatment group in an experiment consisted of three replicate wells of 20 oocytes per well and the entire experiment was repeated three times. Results were analyzed by one-way ANOVA followed by the Bonferroni test. Different letters denote significant differences between the treatment groups ( $p < 0.05$ ) in the *post hoc* test.
